# Supplementary material for: Generation and Analysis of Expressed Sequence Tags (ESTs) from Halophyte Atriplex canescens to Explore Salt-Responsive Related Genes
Source: PubMed Central journal article supplement (PMC4100206; doi:10.3390/ijms150611172), 2014-06-23
Supplement: ijms-15-11172-s001.pdf [file ijms-15-11172-s001.pdf]

## Supplementary Information

**Figure S1.** Agarose gel electrophoresis analysis. (A) Total RNA extracted from materials treated with NaCl stress 48 h; (B) PCR analyses of partial cDNA insert fragments, lanes 1 to 32 = single colony; (C) MW, 1 kb Plus DNA ladder (Invitrogen).

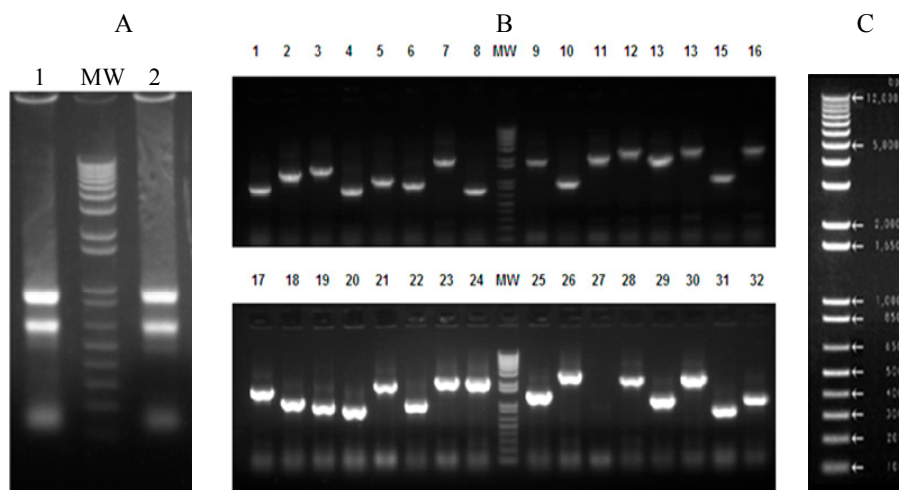

**Table S1.** General characteristics of *A. canescens* ESTs.

| Items                           | Number  |
|---------------------------------|---------|
| Total sequenced cDNA            | 413     |
| Total number of ESTs analyzed   | 343     |
| Total reading valid length (bp) | 322,524 |
| Average EST length (bp)         | 940     |
| G + C content (%)               | 44.66   |
| Unigenes                        | 197     |
| Contigs                         | 50      |
| Singletons                      | 147     |
| Redundancy <sup>a</sup>         | 42.6%   |

Redundancy<sup>a</sup> = number of Unigenes assembled in total ESTs; The redundancy of the library was calculated as  $[(1 - \text{Number of Unigenes}/\text{Number of ESTs}) \times 100\%]$ .

**Table S2.** Abundant ESTs found in *A. canescens* DNA library.

| Putative Function (E-Value < 10 <sup>-4</sup> ) | Number of ESTs | Percentage of Total * |
|-------------------------------------------------|----------------|-----------------------|
| Uncharacterized classification                  | 58             | 16.9                  |
| Chlorophyll A/B binding protein                 | 10             | 2.62                  |
| Heat shock                                      | 8              | 2.33                  |
| Glyceraldehyde-3-phosphate dehydrogenase        | 8              | 2.33                  |
| Ribosomal protein                               | 6              | 1.74                  |
| Ubiquitin                                       | 5              | 1.45                  |
| Eukaryotic elongation factor                    | 5              | 1.45                  |
| Early light induced protein                     | 4              | 1.16                  |
| DEAD-box ATP-dependent RNA helicase             | 4              | 1.16                  |
| Oxygen-evolving enhancer protein                | 4              | 1.16                  |
| Total                                           | 108            | 32.28                 |

\* Percentage = Number of ESTs/Number of total ESTs × 100%

**Table S3.** Pair of primers of salt resistance-related genes and reference gene for quantitative RT-PCR (in the order of accessions presented in Table 1).

| Accession NO. | Genes Description                                       | Forward Primers                 | Reverse Primers                    |
|---------------|---------------------------------------------------------|---------------------------------|------------------------------------|
| JZ535996      | Dehydration-responsive element binding protein          | 5'-CTCTAACCCGATGCCTGCTT-3'      | 5'-CTCTTCCCGCTGTTCTCCTG-3'         |
| JZ535839      | Stress-induced protein sti1-like protein                | 5'-TAAAGCAAGCCGTGGGGATT-3'      | 5'-GCTGCCTTAGGGTTCTCCTG-3'         |
| JZ536071      | Manganese tolerance protein                             | 5'-TGGAACCACCACAAGGCAAT-3'      | 5'-TCGAGGTGAACAAAAGCACG-3'         |
| JZ536087      | Non-specific lipid-transfer protein-like protein        | 5'-AGCAAGCTAGGCGATGTTGT-3'      | 5'-TGGACCTTGAAGCAGTAGG-3'          |
| JZ535867      | Bidirectional sugar transporter SWEET1-like             | 5'-TCTTCTTGCTCCCCGAAACT-3'      | 5'-GCATTAGCAGGCTTGATCGC-3'         |
| JZ535960      | Ethylene response factor 3                              | 5'-CGAGCTCGATGGCTCAAGCTATGGC-3' | 5'-CGGGGTACCACCAAGCTTGGCAAGAACA-3' |
| JZ535825      | Abscisic acid stress ripening protein                   | 5'-ATACACCGAGACCACCACCA-3'      | 5'-AGCTCACCCAAATGCTCCTT-3'         |
| JZ535968      | Glycine and proline-rich protein                        | 5'-GCTGGTTATCCAGGGGGTTC-3'      | 5'-TTCCCATGCTTCCCATGCTT-3'         |
| JZ535907      | Leucine-rich repeat receptor-like protein kinase        | 5'-GCCGTCAAGGTGCTCTCTAA-3'      | 5'-GCTGGGTCCTTCTTCACAGT-3'         |
| JZ535969      | Chlorophyll a/b binding protein                         | 5'-CGGTGGTAGCTTTGACCCAT-3'      | 5'-GGCCCTTCCGGTGACAATA-3'          |
| JZ535848      | 23 kDa Precursor protein of the oxygen-evolving complex | 5'-GGTTGGCTCTCACTGTCCTC-3'      | 5'-AATCCTTCGCCGTTGTAGGG-3'         |
| JZ536063      | General transcription factor IIE subunit 1-like         | 5'-AAGGGCATGATTCCGATGCT-3'      | 5'-GGCTGCAGGCCTTGATGATA-3'         |
| JZ535986      | Ankyrin domain protein                                  | 5'-GTTCTGTGCCAGACGAGTCA-3'      | 5'-CCCTCCACATCACCATGCT-3'          |
| JZ535815      | Ubiquitin                                               | 5'-AGAGACTATGACCAGGCGGT-3'      | 5'-GTCTCCCATCTCCAGACT-3'           |
| JZ536095      | Dof-type zinc finger domain-containing protein          | 5'-GATGGATGCTGTGCTCCCTT-3'      | 5'-AGTGTTACCATGCCATCCG-3'          |
| JZ536113      | NADH dehydrogenase                                      | 5'-TAAGCCTTGCCTTCCTCAGC-3'      | 5'-CGTGGGTTACCCTTTACCCG-3'         |
| JZ536089      | S-adenosylmethionine synthase                           | 5'-ATGGTACCTGCCCATGGTTG-3'      | 5'-TCCTTCAAGTCAGCGGCAAT-3'         |
| JZ536067      | 3-Ketoacyl CoA thiolase                                 | 5'-GATGAAGCGCCGTGGTAAAG-3'      | 5'-ACGAGCGTTGCTTAGGTCAT-3'         |
| JZ535984      | Short chain alcohol dehydrogenase-like                  | 5'-ATTTGGCATGTGAATGGGCG-3'      | 5'-CGAGACTCGACTGCCTTCAA-3'         |
| JZ536011      | Chitinase                                               | 5'-AAGTTCGGGACTGGTGGTTC-3'      | 5'-CCCAATGCTTTTACCCGCTG-3'         |
| JZ535943      | Aquaporin                                               | 5'-CCTCTACATAACCGTCGCTAC-3'     | 5'-TTCACCAAACCCACTCCA-3'           |
| JZ535964      | Early nodulin 55-2 precursor                            | 5'-AATCTTCGCAGCAACAGC-3'        | 5'-CCAACACCAACTGAAGGAA-3'          |
| JZ535896      | Sodium-bile acid cotransporter                          | 5'-GGAAATGTTGCGCTCTCAGT-3'      | 5'-TGGGCTTGGGCTAAATGAGT-3'         |
| KJ027085      | EF1a                                                    | 5'-CCCCAGTTCTCGACTGTCAC-3'      | 5'-TGGTGGGAACCATCTTCACG-3'         |
